# Supplementary material for: Meroterpenoids from Marine Sponge Hyrtios sp. and Their Anticancer Activity against Human Colorectal Cancer Cells
Source: MDPI journal article supplement (doi:10.3390/md22040183), 2024-04-19
Supplement: s1 [file s1]

## Supporting Information

# Meroterpenoids from Marine Sponge *Hyrtios* sp. and Their Anticancer Activity against Human Colorectal Cancer Cells

Jie Wang <sup>1,†,\*</sup>, Yue-Lu Yan <sup>1,†</sup>, Xin-Yi Yu <sup>1</sup>, Jia-Yan Pan <sup>1</sup>, Xin-Lian Liu <sup>1</sup>, Li-Li Hong <sup>2,\*</sup> and Bin Wang <sup>1,\*</sup>

<sup>1</sup> Zhejiang Provincial Engineering Technology Research Center of Marine Biomedical Products, School of Food and Pharmacy, Zhejiang Ocean University, Zhoushan 316022, China; yyuelu03@163.com (Y.-L.Y.); 17355410304@163.com (X.-Y.Y.); pjy2388@163.com (J.-Y.P.); lxl19960817@163.com (X.-L.L.)

<sup>2</sup> Research Center for Marine Drugs, Department of Pharmacy, Ren Ji Hospital, School of Medicine, Shanghai Jiao Tong University, Shanghai 200127, China.

\* Correspondence: 011103@zjou.edu.cn (J.W.); hongll0792@sjtu.edu.cn (L.-L.H.); wangbin@zjou.edu.cn (B.W.);

† These authors contributed equally to this work.

### List of Content

Figure S1. HRESIMS spectrum of compound **1**

Figure S2. UV Spectrum of compound **1**

Figure S3. <sup>1</sup>H NMR (600 MHz) Spectrum of compound **1** in CDCl<sub>3</sub>

Figure S4. <sup>13</sup>C NMR (150 MHz) Spectrum of compound **1** in CDCl<sub>3</sub>

Figure S5. HMQC Spectrum of compound **1** in CDCl<sub>3</sub>

Figure S6. HMBC Spectrum of compound **1** in CDCl<sub>3</sub>

Figure S7. COSY Spectrum of compound **1** in CDCl<sub>3</sub>

Figure S8. NOESY Spectrum of compound **1** in CDCl<sub>3</sub>

Figure S9. HRESIMS spectrum of compound **2**

Figure S10. UV Spectrum of compound **2**

Figure S11.  $^1\text{H}$  NMR (400 MHz) Spectrum of compound **2** in  $\text{CDCl}_3$

Figure S12.  $^{13}\text{C}$  NMR (100 MHz) Spectrum of compound **2** in  $\text{CDCl}_3$

Figure S13. HMQC Spectrum of compound **2** in  $\text{CDCl}_3$

Figure S14. HMBC Spectrum of compound **2** in  $\text{CDCl}_3$

Figure S15. COSY Spectrum of compound **2** in  $\text{CDCl}_3$

Figure S16. NOESY Spectrum of compound **2** in  $\text{CDCl}_3$

Figure S17. ESI-MS spectrum of compound **3**

Figure S18.  $^1\text{H}$  NMR (600 MHz) Spectrum of compound **3** in  $\text{CDCl}_3$

Figure S19.  $^{13}\text{C}$  NMR (150 MHz) Spectrum of compound **3** in  $\text{CDCl}_3$

Figure S20. ESI-MS spectrum of compound **4**

Figure S21.  $^1\text{H}$  NMR (600 MHz) Spectrum of compound **4** in  $\text{CDCl}_3$

Figure S22.  $^{13}\text{C}$  NMR (150 MHz) Spectrum of compound **4** in  $\text{CDCl}_3$

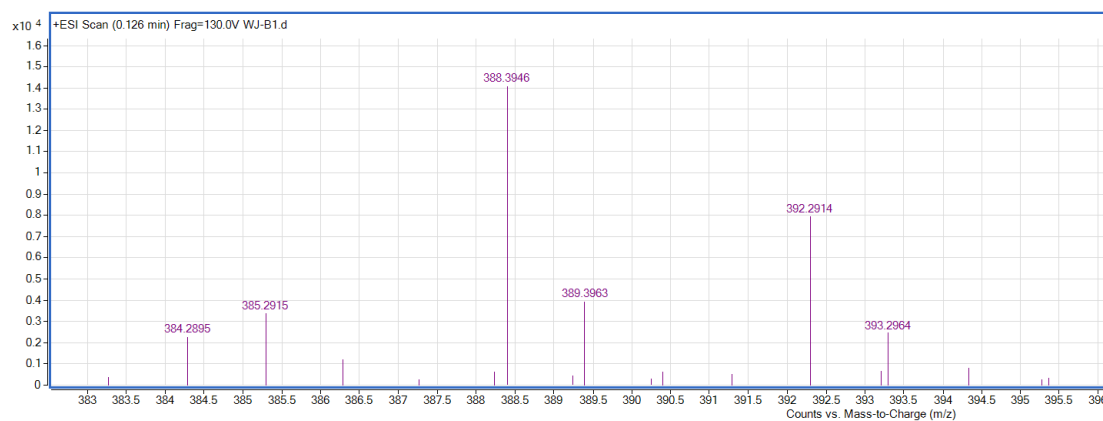

**Figure S1.** HRESIMS spectrum of compound **1**

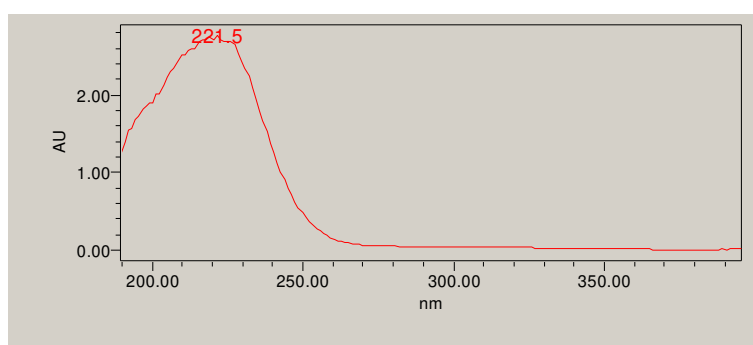

**Figure S2.** UV Spectrum of compound **1**

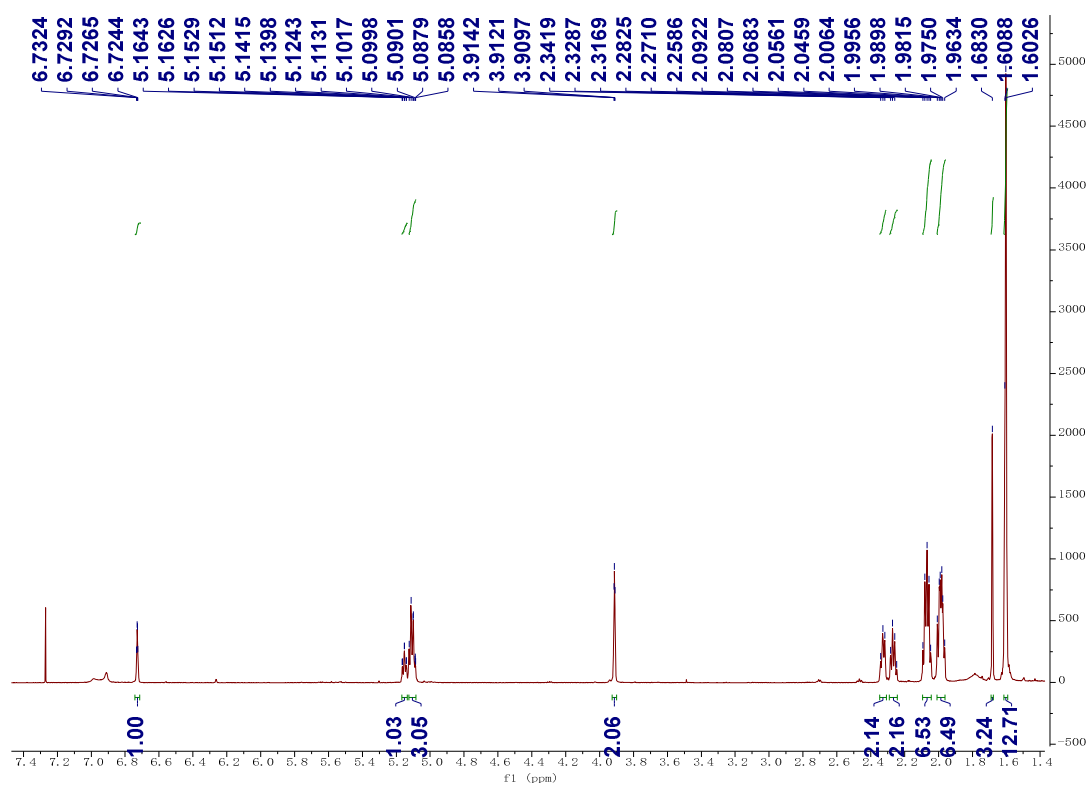

**Figure S3.** <sup>1</sup>H NMR (600 MHz) Spectrum of compound **1** in CDCl<sub>3</sub>

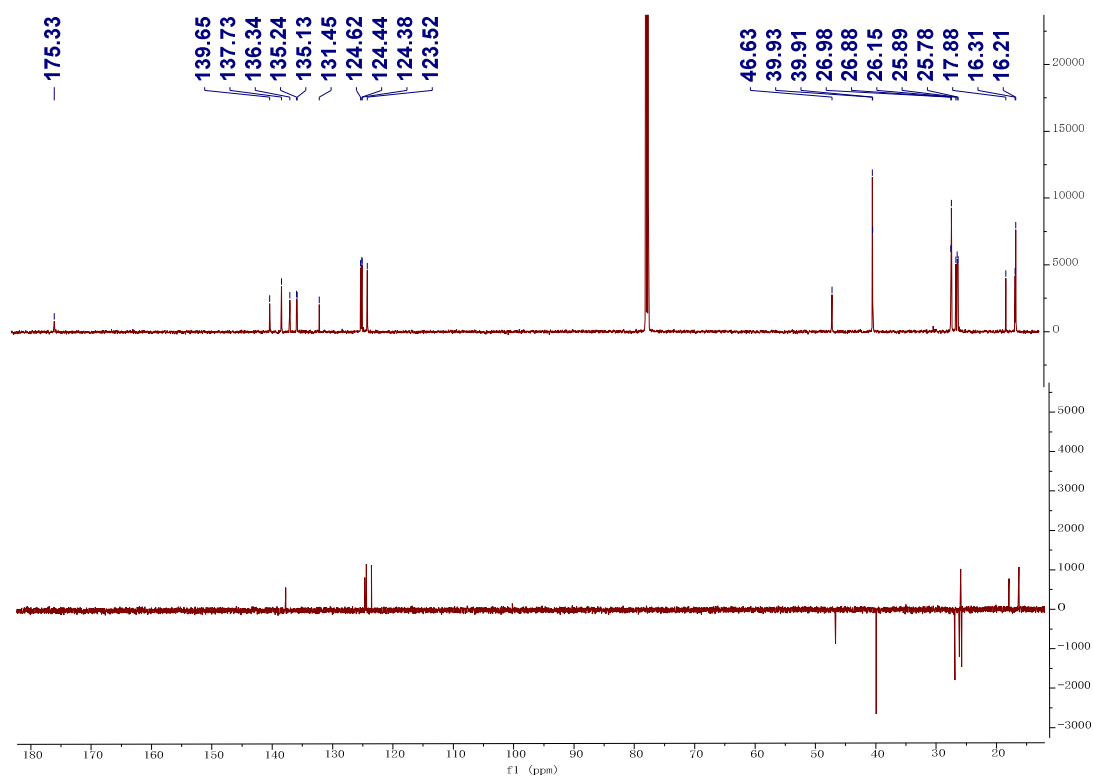

**Figure S4.**  $^{13}\text{C}$  NMR (150 MHz) Spectrum of compound **1** in  $\text{CDCl}_3$

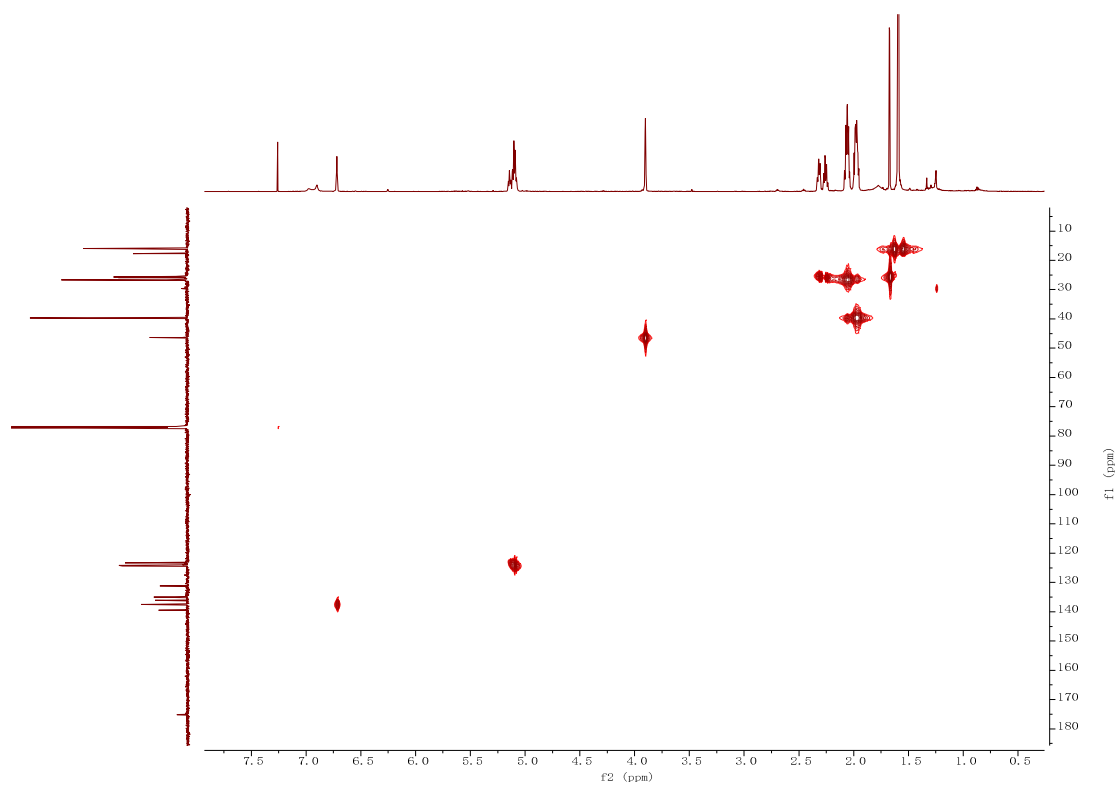

**Figure S5.** HMQC Spectrum of compound **1** in  $\text{CDCl}_3$

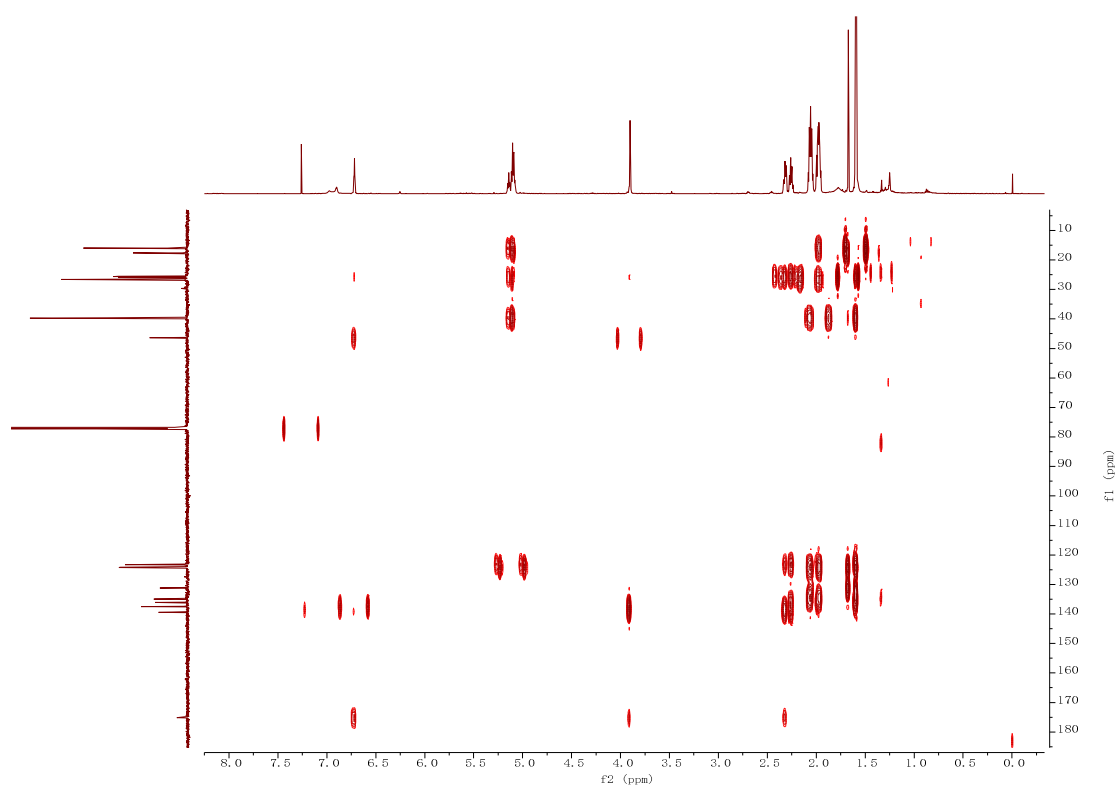

**Figure S6.** HMBC Spectrum of compound **1** in CDCl<sub>3</sub>

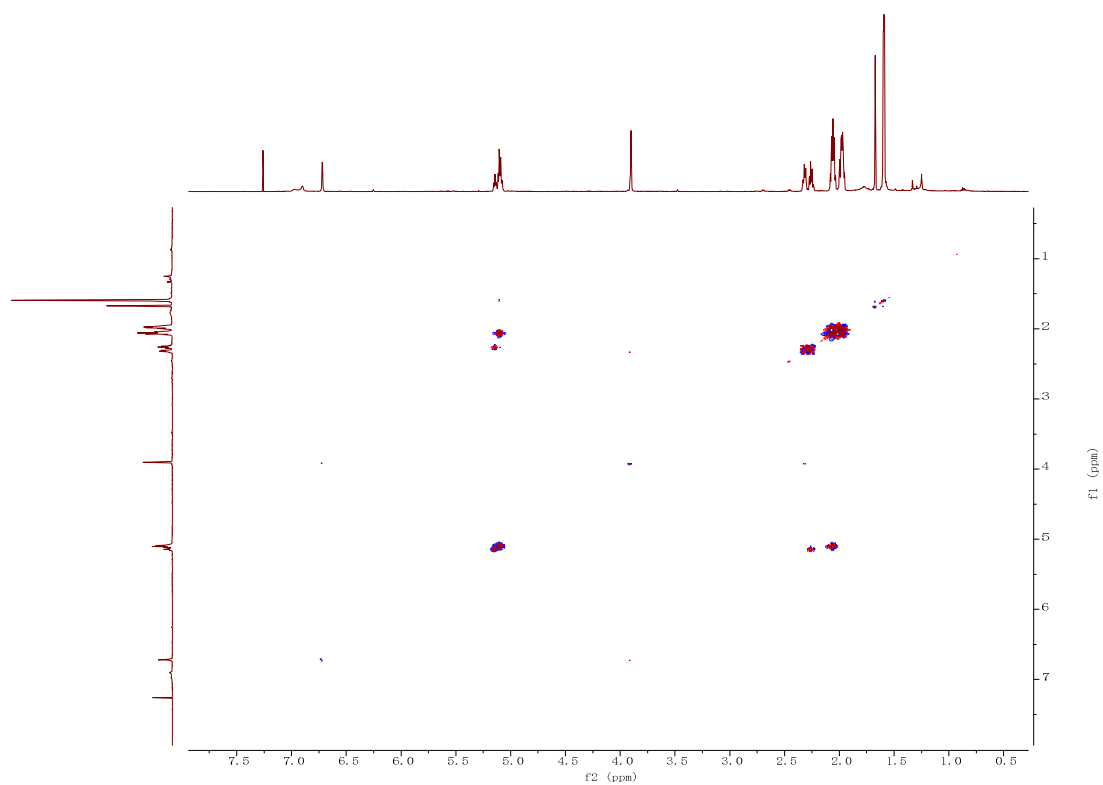

**Figure S7.** COSY Spectrum of compound **1** in CDCl<sub>3</sub>

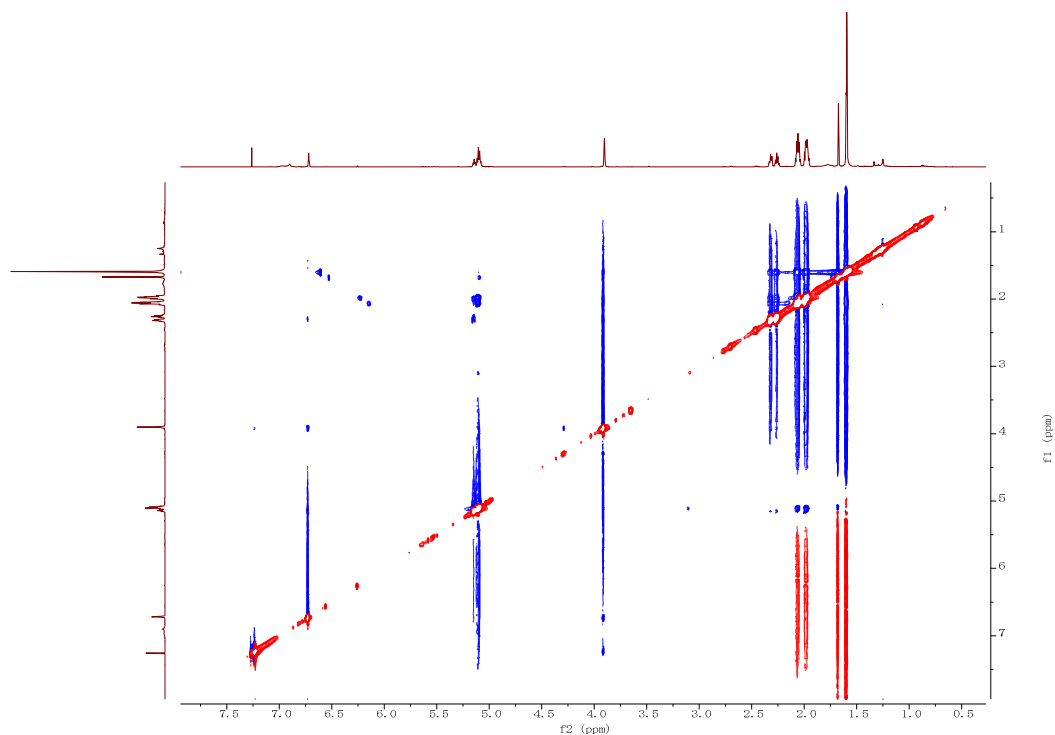

**Figure S8.** NOESY Spectrum of compound **1** in  $\text{CDCl}_3$

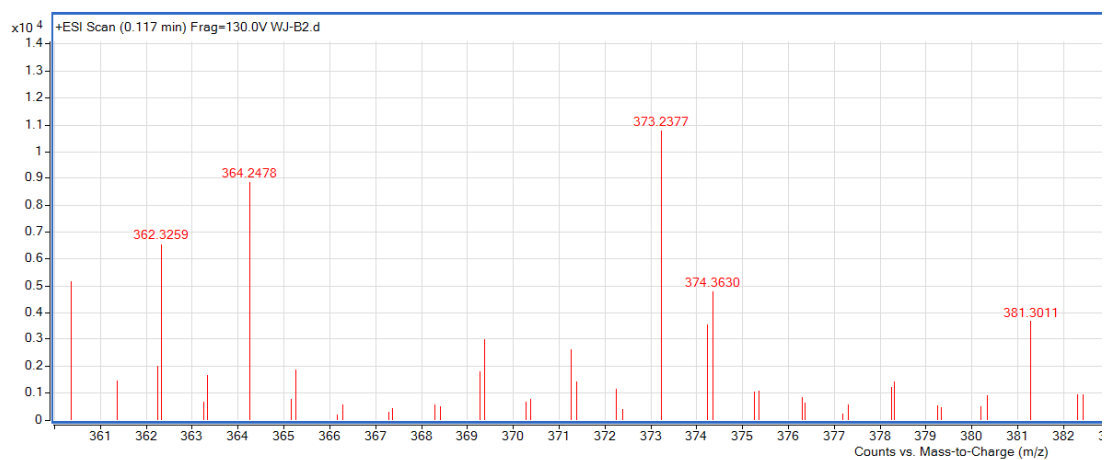

**Figure S9.** HRESIMS spectrum of compound **2**

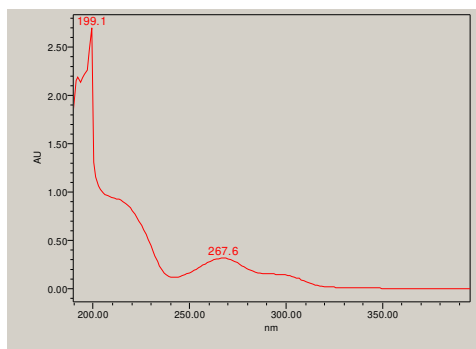

**Figure S10.** UV Spectrum of compound **2**

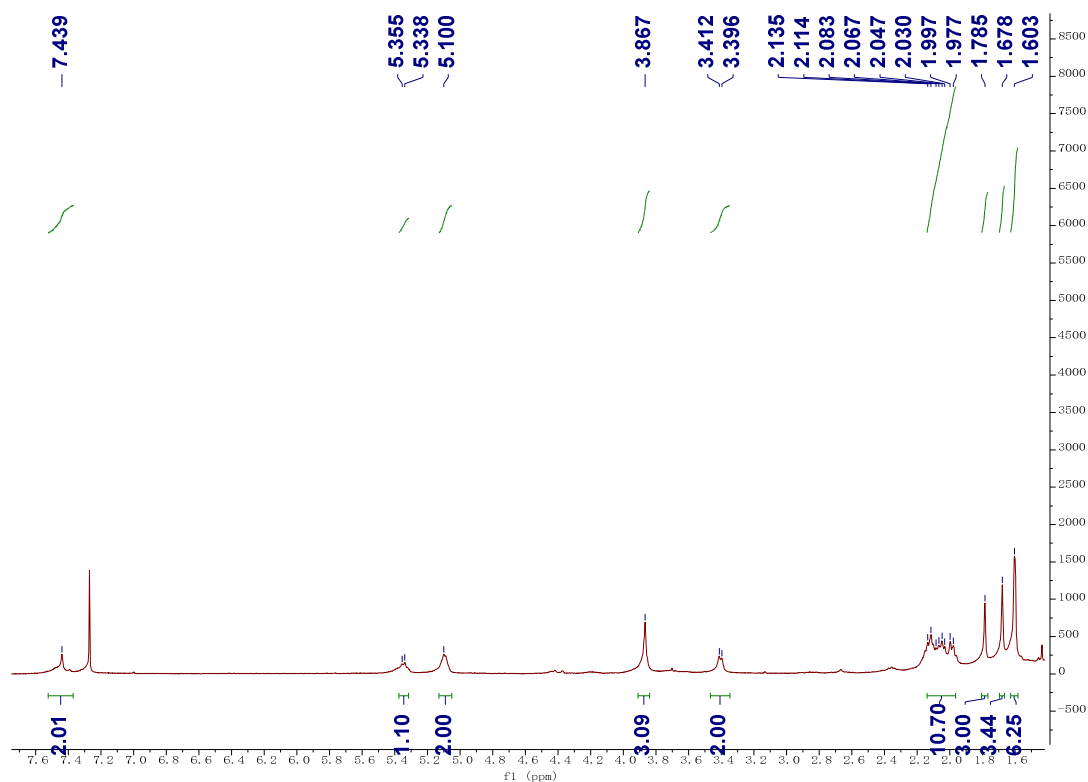

**Figure S11.** <sup>1</sup>H NMR (400 MHz) Spectrum of compound **2** in CDCl<sub>3</sub>

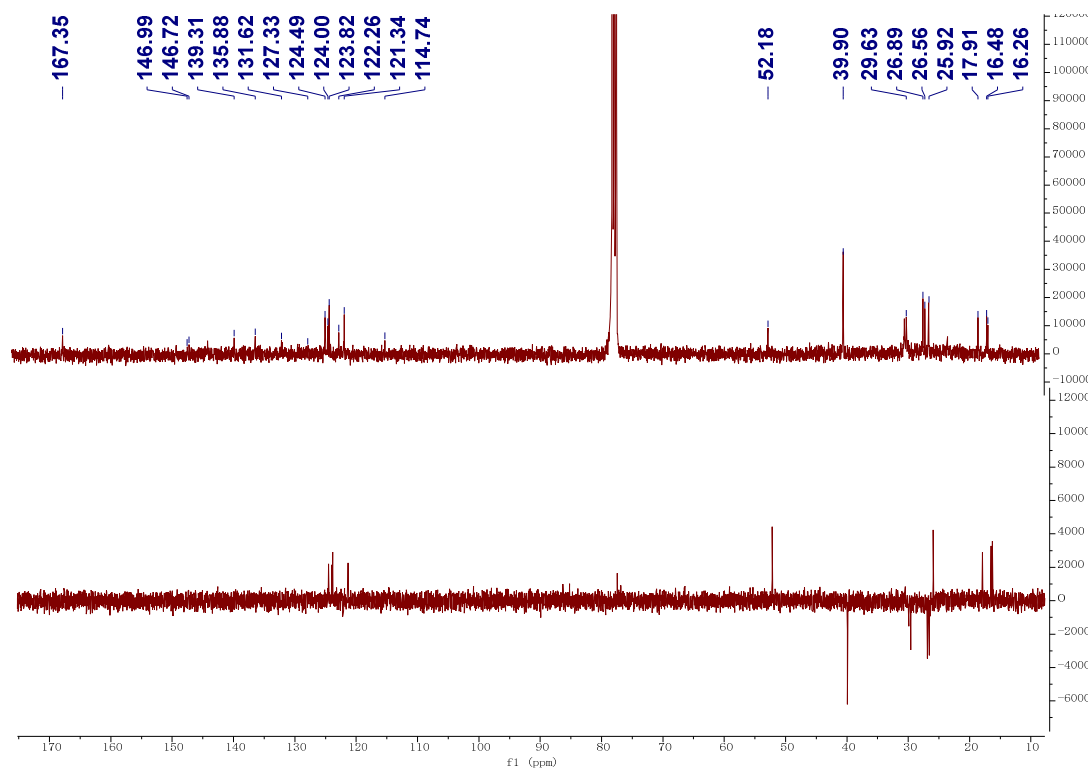

**Figure S12.** <sup>13</sup>C NMR (100 MHz) Spectrum of compound **2** in CDCl<sub>3</sub>

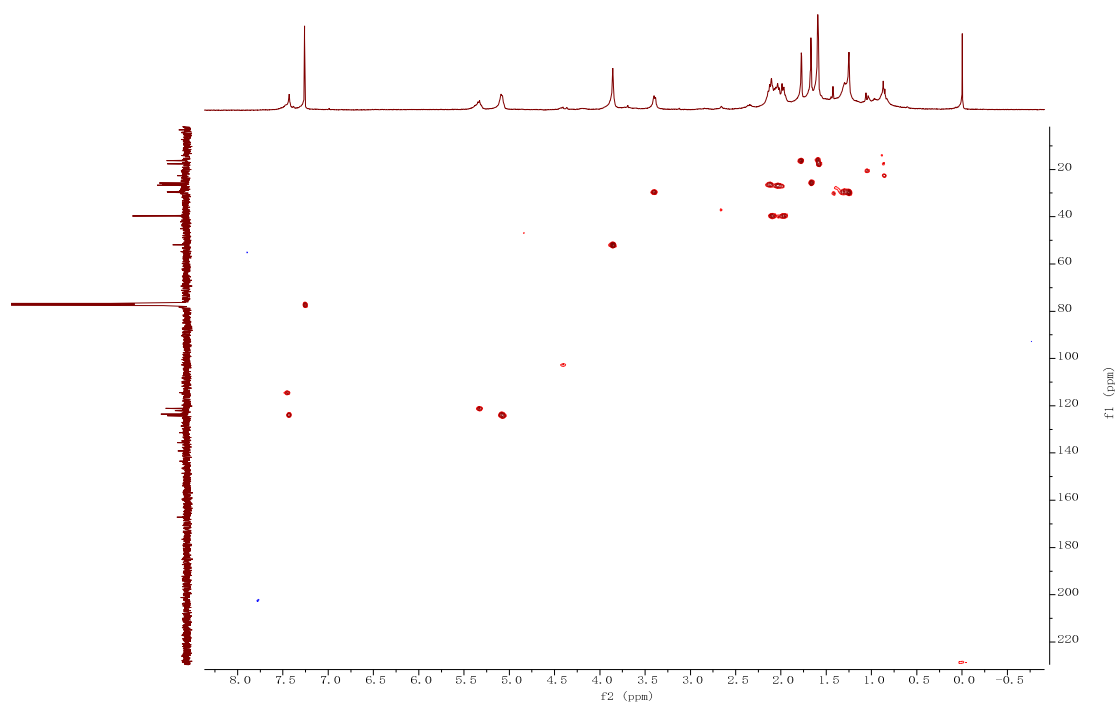

**Figure S13.** HMBC Spectrum of compound **2** in CDCl<sub>3</sub>

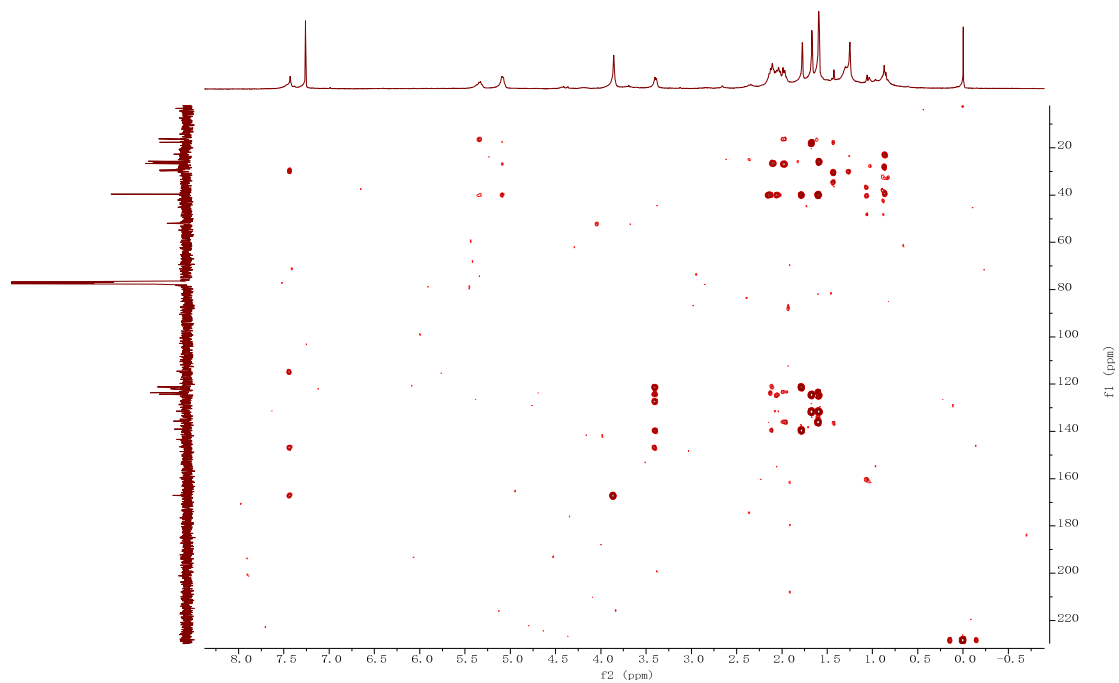

**Figure S14.** HMBC Spectrum of compound **2** in CDCl<sub>3</sub>



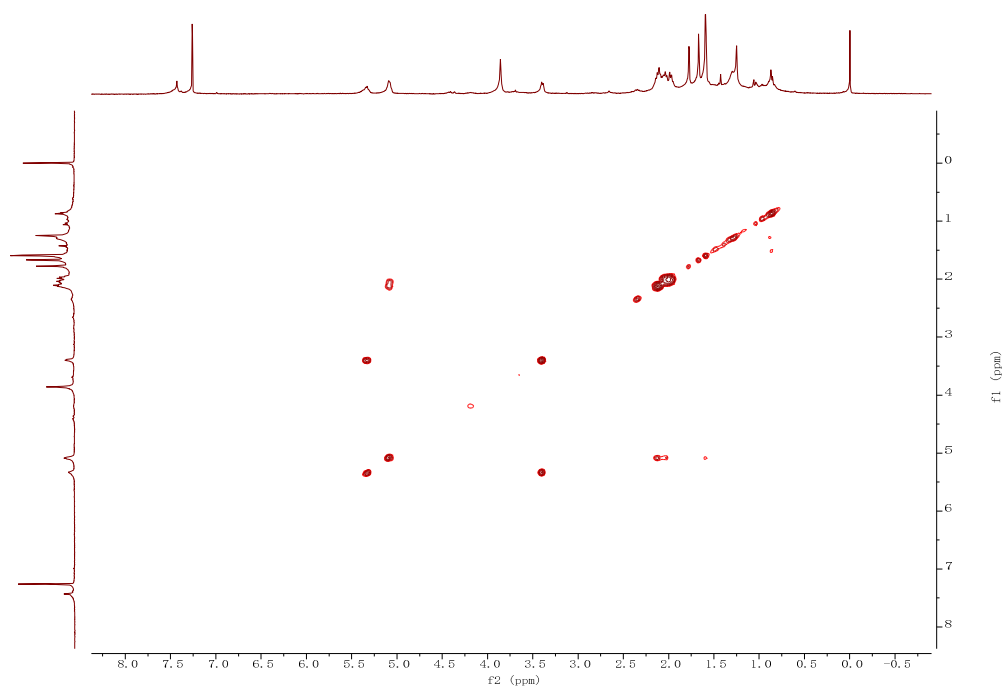

**Figure S15.** COSY Spectrum of compound **2** in CDCl<sub>3</sub>

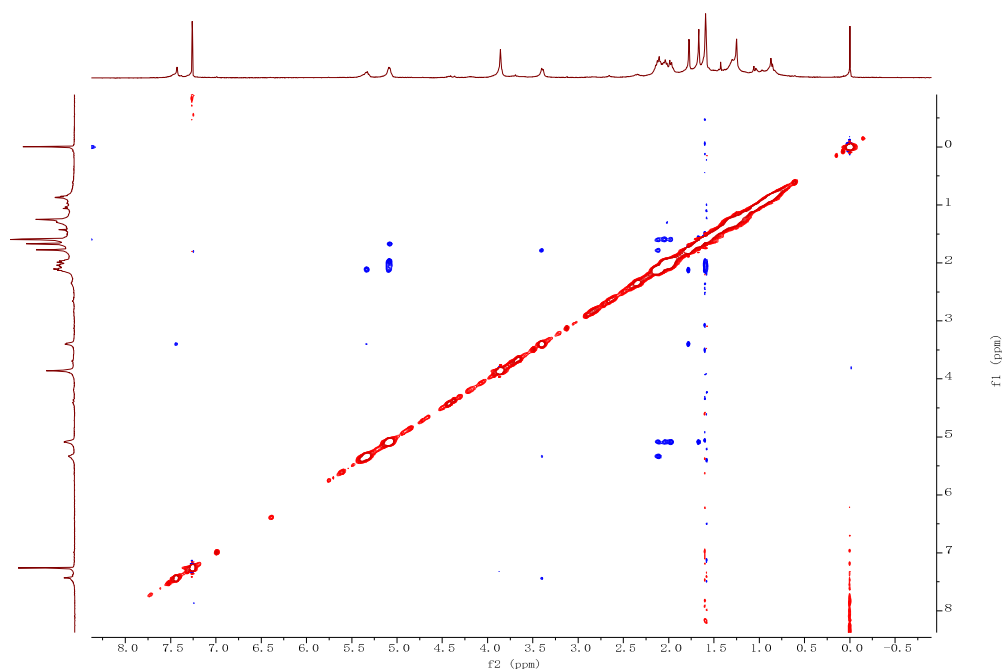

**Figure S16.** NOESY Spectrum of compound **2** in CDCl<sub>3</sub>

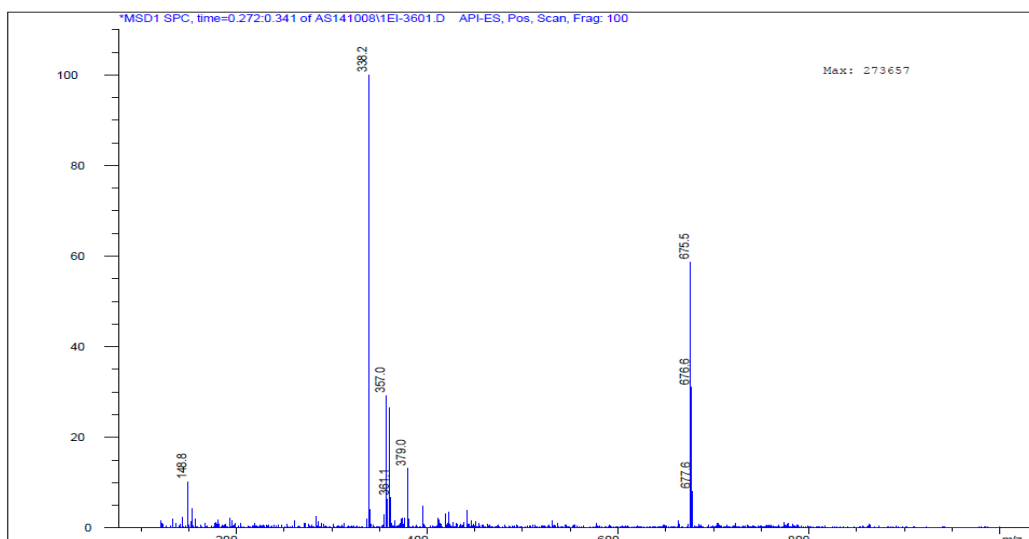

**Figure S17.** ESI-MS spectrum of compound **3**

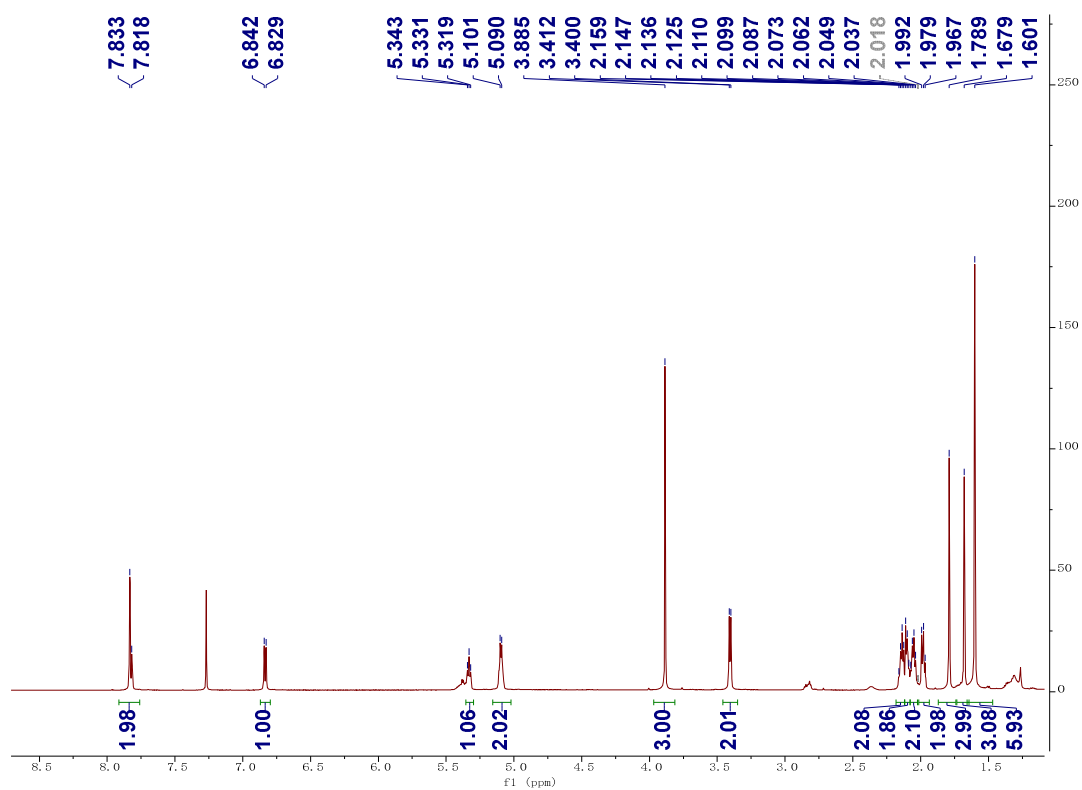

**Figure S18.**  $^1\text{H}$  NMR (600 MHz) Spectrum of compound **3** in  $\text{CDCl}_3$

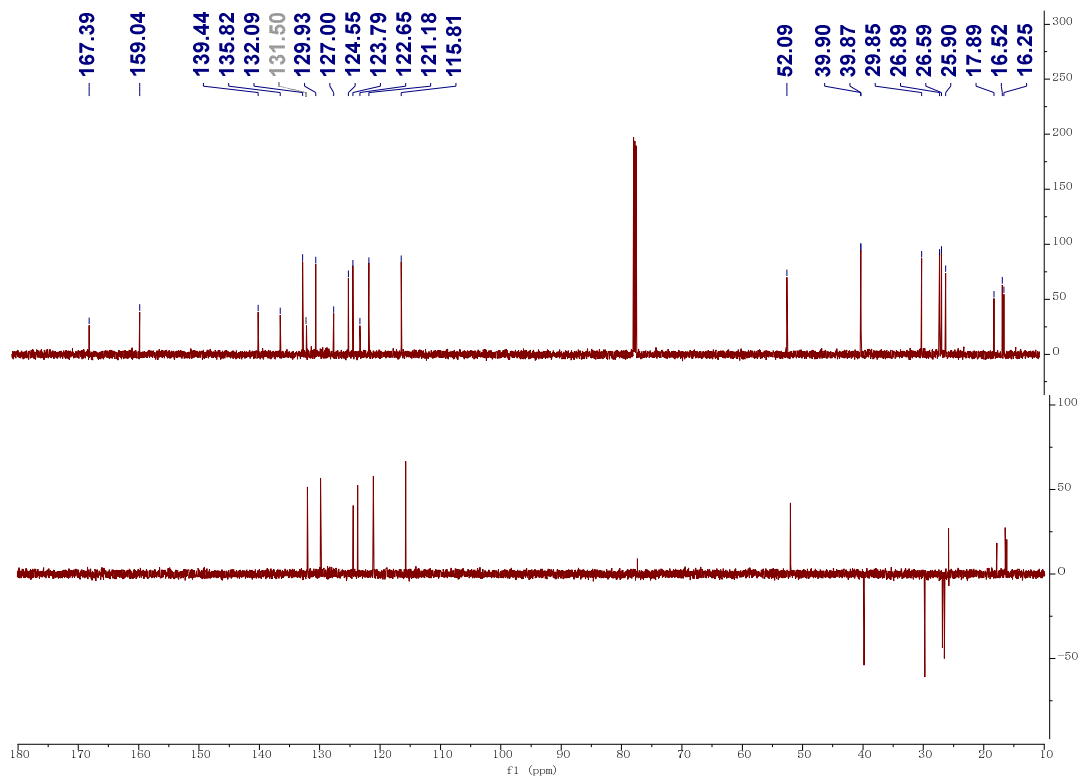

**Figure S19.**  $^{13}\text{C}$  NMR (150 MHz) Spectrum of compound **3** in  $\text{CDCl}_3$

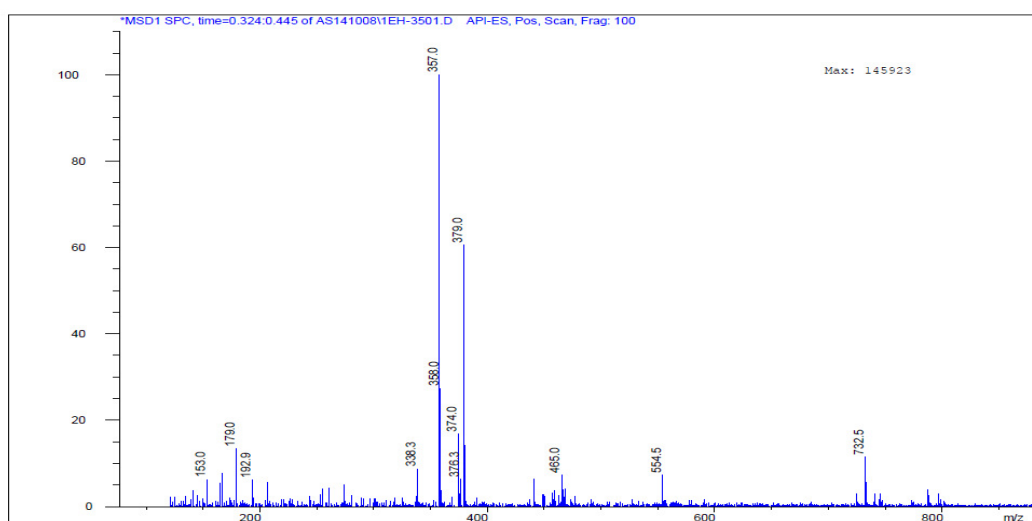

**Figure S20.** ESI-MS spectrum of compound **4**

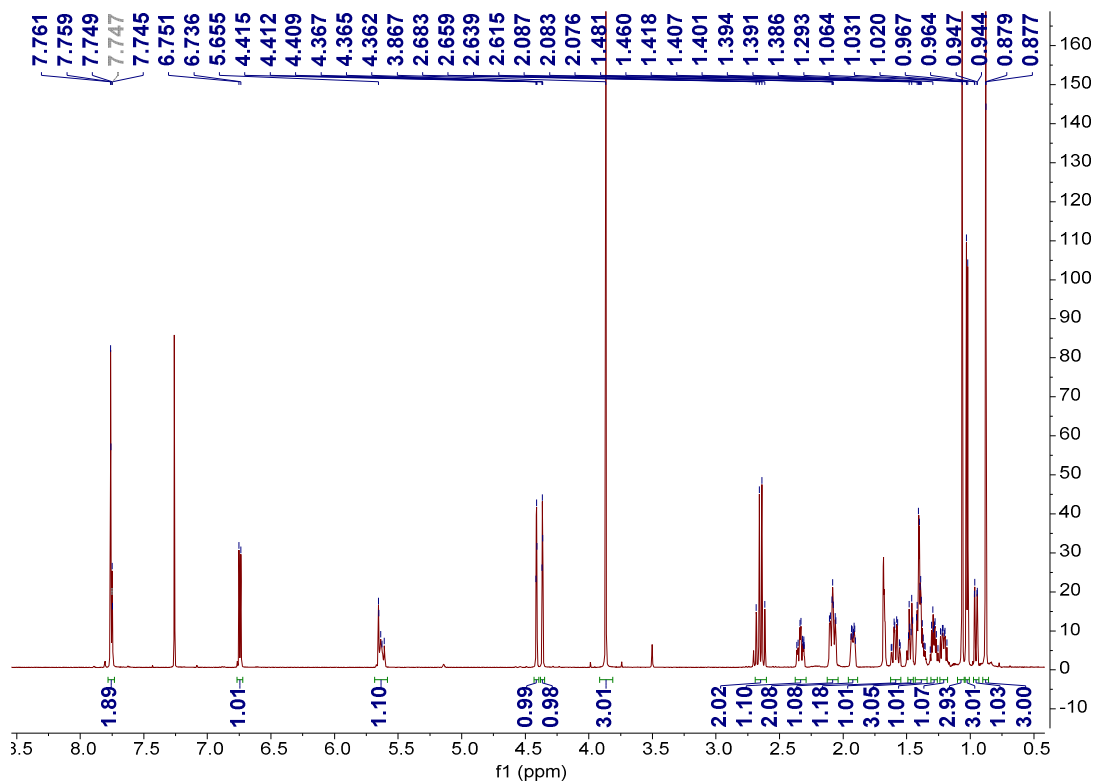

**Figure S21.** <sup>1</sup>H NMR (600 MHz) Spectrum of compound **4** in CDCl<sub>3</sub>

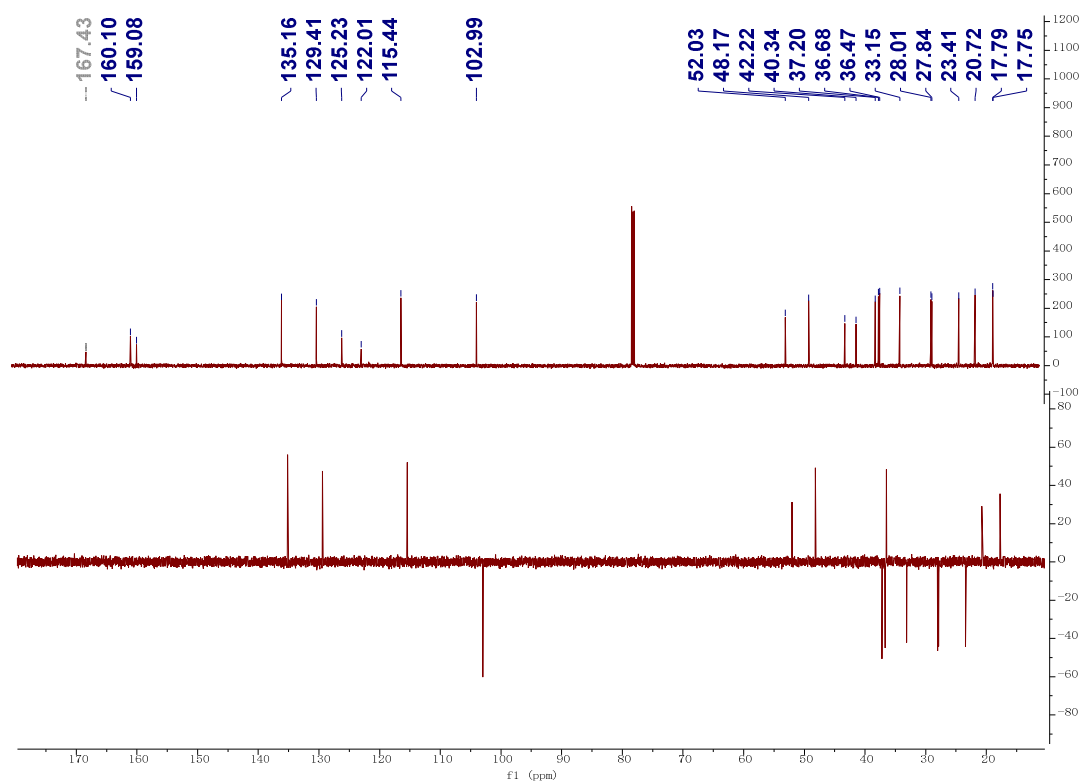

**Figure S22.** <sup>13</sup>C NMR (150 MHz) Spectrum of compound **4** in CDCl<sub>3</sub>
